# Supplementary material for: mTOR inhibition as an adjuvant therapy in a metastatic model of HPV+ HNSCC
Source: PubMed Central journal article supplement (PMC5029697; doi:10.18632/oncotarget.8286), 2016-03-23
Supplement: oncotarget-07-24228-s001.pdf [file oncotarget-07-24228-s001.pdf]

## mTOR inhibition as an adjuvant therapy in a metastatic model of HPV+ HNSCC

### Supplementary Materials

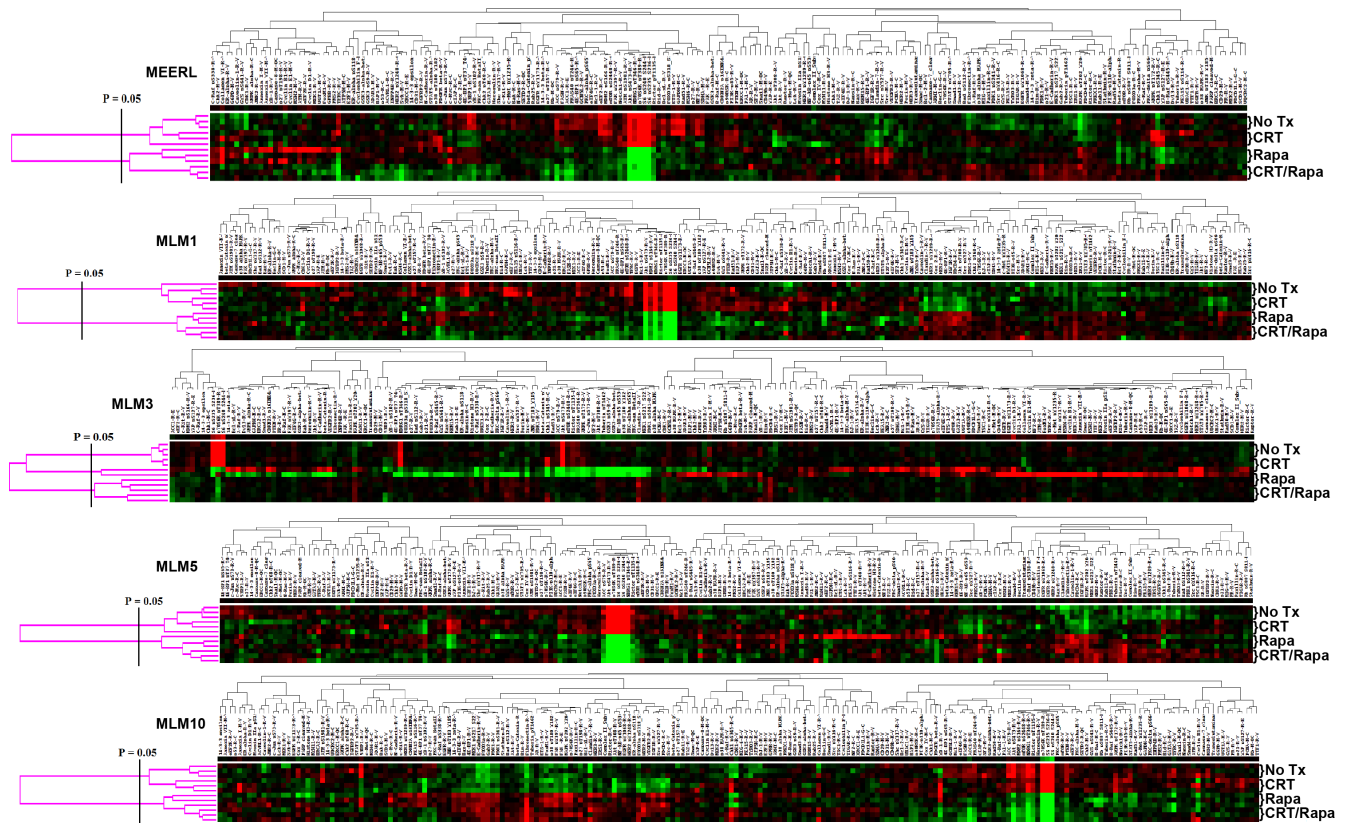

**Supplementary Figure S1: Full-length reverse phase protein expression arrays with median centered unsupervised hierarchical clustering.** Protein expression profiles of mEERL and each MLM cell line under conditions of no treatment (No Tx), CRT, rapamycin (Rapa), and the combination of CRT/rapamycin (CRT/Rapa) are shown, as detailed in the main text and corresponding to Figure 1. From top to bottom: mEERL, MLM1, MLM3, MLM5, & MLM10. Within each array, triplicates of no treatment, CRT, rapamycin, and CRT/rapamycin treated samples are arranged top to bottom, as indicated.

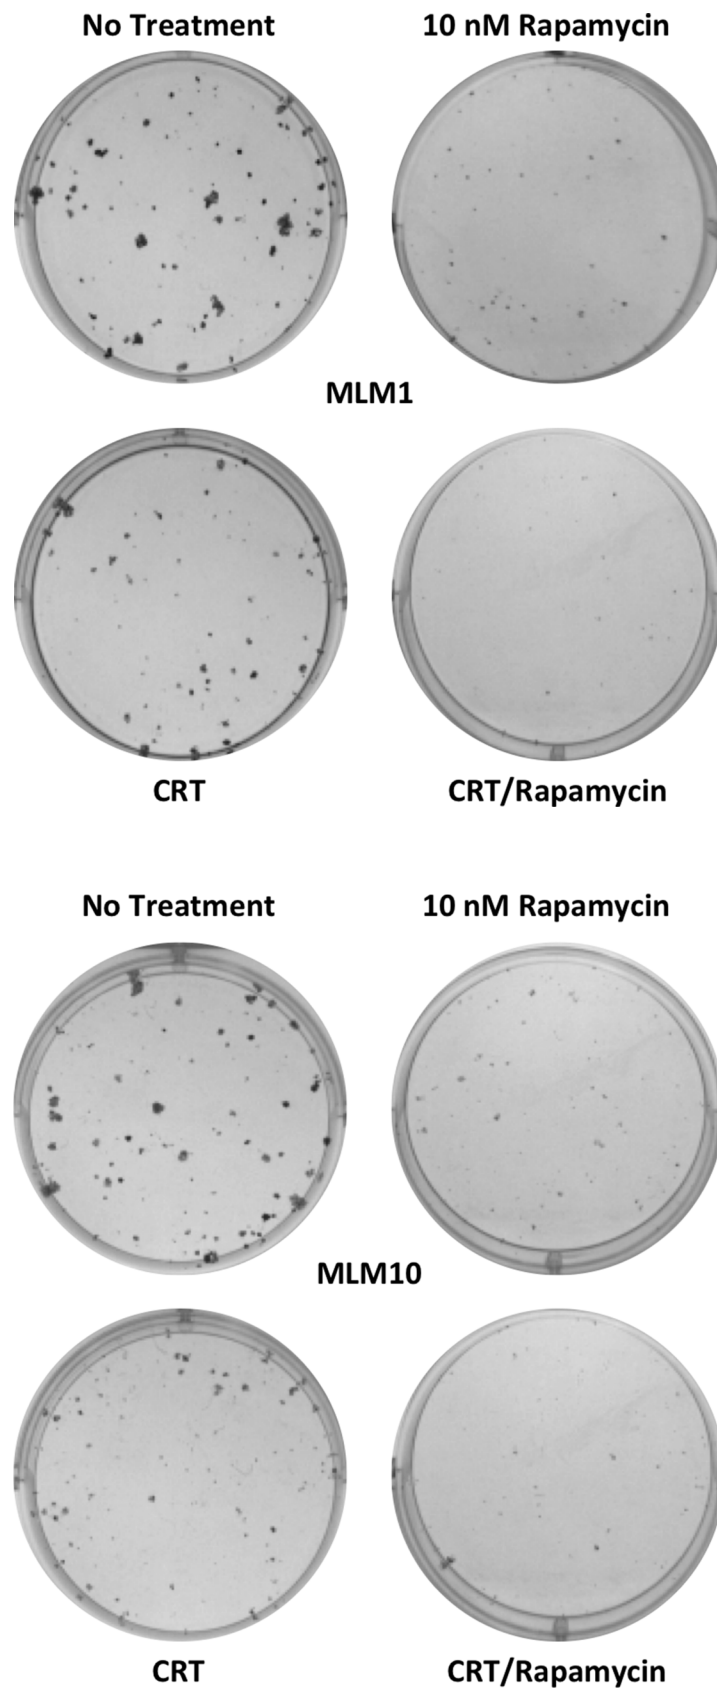

**Supplementary Figure S2: Rapamycin enhances cisplatin & radiation induced cytotoxicity to OPSCC cells, sensitizing recurrent/metastatic cells to treatment.** Representative images of MLM1 and MLM10 clonogenic assays enlarged from Figure 3 to show detail.
